# Supplementary material for: 10-bit tracking ADC with a multi-bit quantizer, variable step size and segmented current-steering DAC
Source: Copernicus journal article supplement (doi:10.5194/ars-17-161-2019), 2019-09-19
Supplement: Supplementary file 1 [file ars-17-161-2019-supplement.zip]

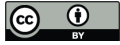

*Supplement of*

## **10-bit tracking ADC with a multi-bit quantizer, variable step size and segmented current-steering DAC**

**Stefan Bramburger and Dirk Killat**

*Correspondence to:* Dirk Killat (killat@b-tu.de) and Stefan Bramburger (stefan.bramburger@ged.de)

- [ars-17-161-2019-supplement-title-page.pdf](#)
- [v\\_crank.mat](#)

The copyright of individual parts of the supplement might differ from the CC BY 4.0 License.
